# Supplementary material for: Rainwater Isotopic Composition in the Ecuadorian Andes and Amazon Reflects Cross-Equatorial Flow Seasonality
Source: MDPI journal article supplement (doi:10.3390/w14132121), 2022-07-03
Supplement: s1 [file s1]

Archive with 2 entries (2 files):
- Figures S1-S9.pdf
- Table S1.xlsx
