# Supplementary material for: Rainwater Isotopic Composition in the Ecuadorian Andes and Amazon Reflects Cross-Equatorial Flow Seasonality
Source: MDPI journal article supplement (doi:10.3390/w14132121), 2022-07-03
Supplement: s1 [file s1 › Table S1.xlsx]

## Sheet: Table S1
Table S1. Mera monitoring (1° 24’ S, 78° 03’ W, 1200 m a.s.l.)
Year	Month	Temp °C	Collector Prec mm	δ2H	δ18O	d-excess
2019	2	19.2764	301.55	-12.5439	-3.06514	11.9772
2019	3	19.3583	228.167	-40.0407	-6.38911	11.0722
2019	4	19.7192	348.75	-103.396	-13.9562	8.25387
2019	5	19.2879	316.466	-86.5182	-12.2563	11.5323
2019	6	19.0494	297.966	-38.4946	-6.51065	13.5907
2019	7	18.2916	170.6	-24.017	-5.02914	16.2161
2019	8	18.4506	192.7	0.794344	-1.96735	16.5331
2019	9	19.2357	103.066	-19.8962	-4.41816	15.4491
2019	10	18.897	195.3	-42.8983	-7.06976	13.6598
2019	11	19.4059	195.533	-53.5154	-8.40454	13.721
2019	12	19.405	287.766	-28.5431	-4.78271	9.71861
2020	1	19.326	128.066	-15.7306	-3.37291	11.2527
2020	2	19.4649	95.566	-1.50812	-1.64247	11.6317
2020	3	19.6725	83.8	-47.7128	-7.42379	11.6776
2020	4	19.1489	253.9	-78.0958	-11.2561	11.9526
2020	5		261.533	-91.8894	-12.7089	9.78215
2020	6	18.6513	295.266	-62.2907	-9.13564	10.7945
2020	7	18.1722	82.766	-50.6926	-7.95217	12.9248
2020	8	18.5066	24.766	-20.6707	-4.4093	14.6037
2020	9	18.667	96.2	-28.7924	-5.3812	14.2572
2020	10		14.8	-10.4407	-3.40326	16.7854
2020	11		18.733	-44.4623	-6.82544	10.1412
2020	12		122.433	-57.9193	-8.50027	10.0829
2021	1		140.5	-14.9958	-3.50051	13.0082
2021	2		205.333	-49.4304	-7.65298	11.7934
2021	3		186.6	-6.64491	-2.39788	12.5381
2021	4		224.8	-96.8617	-13.3147	9.65592
2021	5		153.566	-85.1757	-11.8633	9.73081
2021	6		238.533	-67.8368	-9.78279	10.4256
2021	7		43.266	-28.3818	-5.07655	12.2306
